# Supplementary material
Source: ML conference proceedings conference paper supplement (https://proceedings.neurips.cc/paper_files/paper/2007/hash/dd8eb9f23fbd362da0e3f4e70b878c16-Abstract.html)
Supplement: Supplementary file [file dd8eb9f23fbd362da0e3f4e70b878c16-Supplemental.zip]

# A Bayesian Framework for Cross-Situational Word Learning

Michael C. Frank, Noah D. Goodman, & Joshua B. Tenenbaum (W33)

## Graphical model

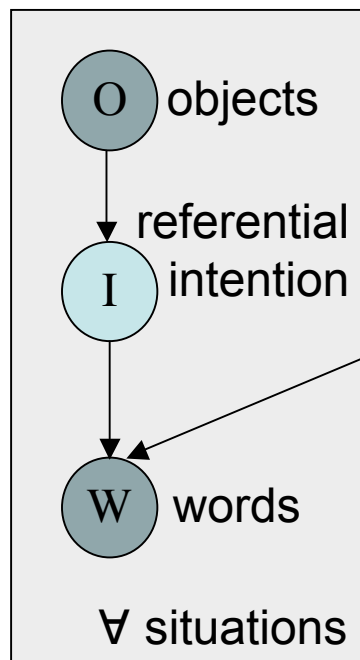

lexicon

| Word               | Object        |
|--------------------|---------------|
| <b>bear</b>        | <b>bear</b>   |
| <b>bigbird</b>     | <b>bird</b>   |
| <b>bird</b>        | <b>duck</b>   |
| <b>birdie</b>      | <b>duck</b>   |
| <b>book</b>        | <b>book</b>   |
| bottle             | bear          |
| <b>bunnies</b>     | <b>bunny</b>  |
| <b>bunnyrabbit</b> | <b>bunny</b>  |
| <b>hand</b>        | <b>hand</b>   |
| <b>hat</b>         | <b>hat</b>    |
| hiphop             | mirror        |
| <b>kittycat</b>    | <b>kitty</b>  |
| <b>lamb</b>        | <b>lamb</b>   |
| laugh              | cow           |
| meow               | baby          |
| mhmm               | hand          |
| <b>mirror</b>      | <b>mirror</b> |
| <b>moocow</b>      | <b>cow</b>    |
| <b>oink</b>        | <b>pig</b>    |
| on                 | ring          |
| <b>pig</b>         | <b>pig</b>    |
| put                | ring          |
| <b>ring</b>        | <b>ring</b>   |
| sheep              | sheep         |

## Quantitative results

Bayesian model

IBM Translation Model I

Mutual information

Transitional probability

Association frequencies

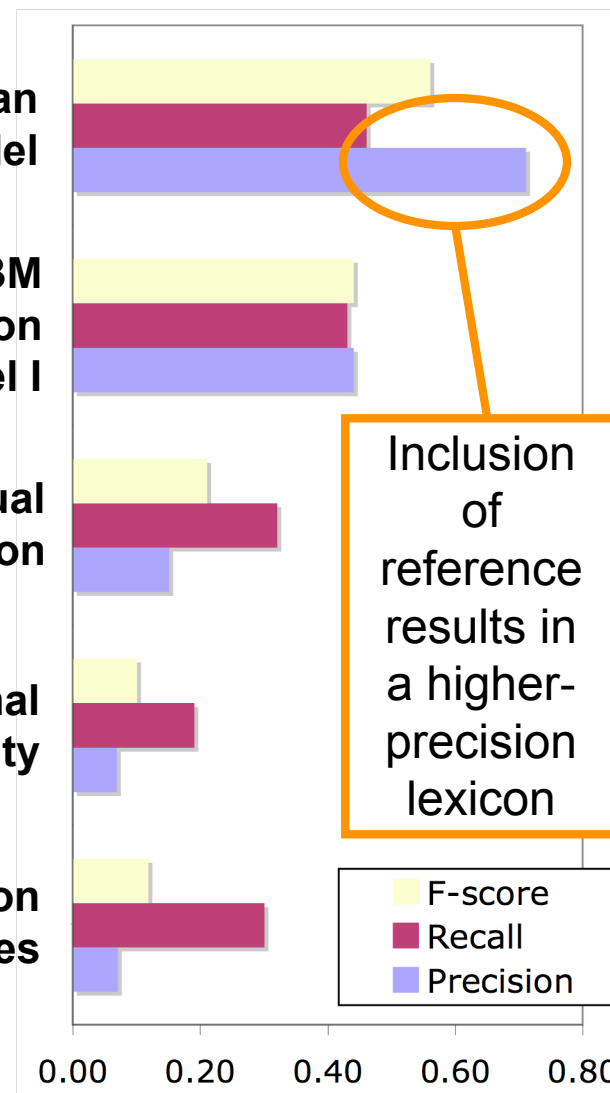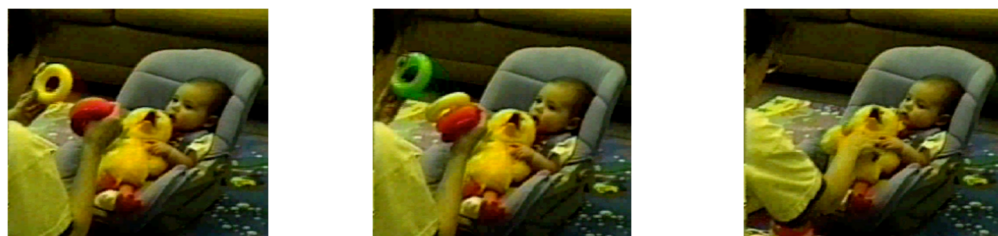

Corpus data from CHILDES annotated with objects
